# Supplementary material
Source: Springer Nature journal article supplement (https://www.springermedizin.de/resource/supplementary/12916_2010_357_MOESM8_ESM.pdf/9599934)

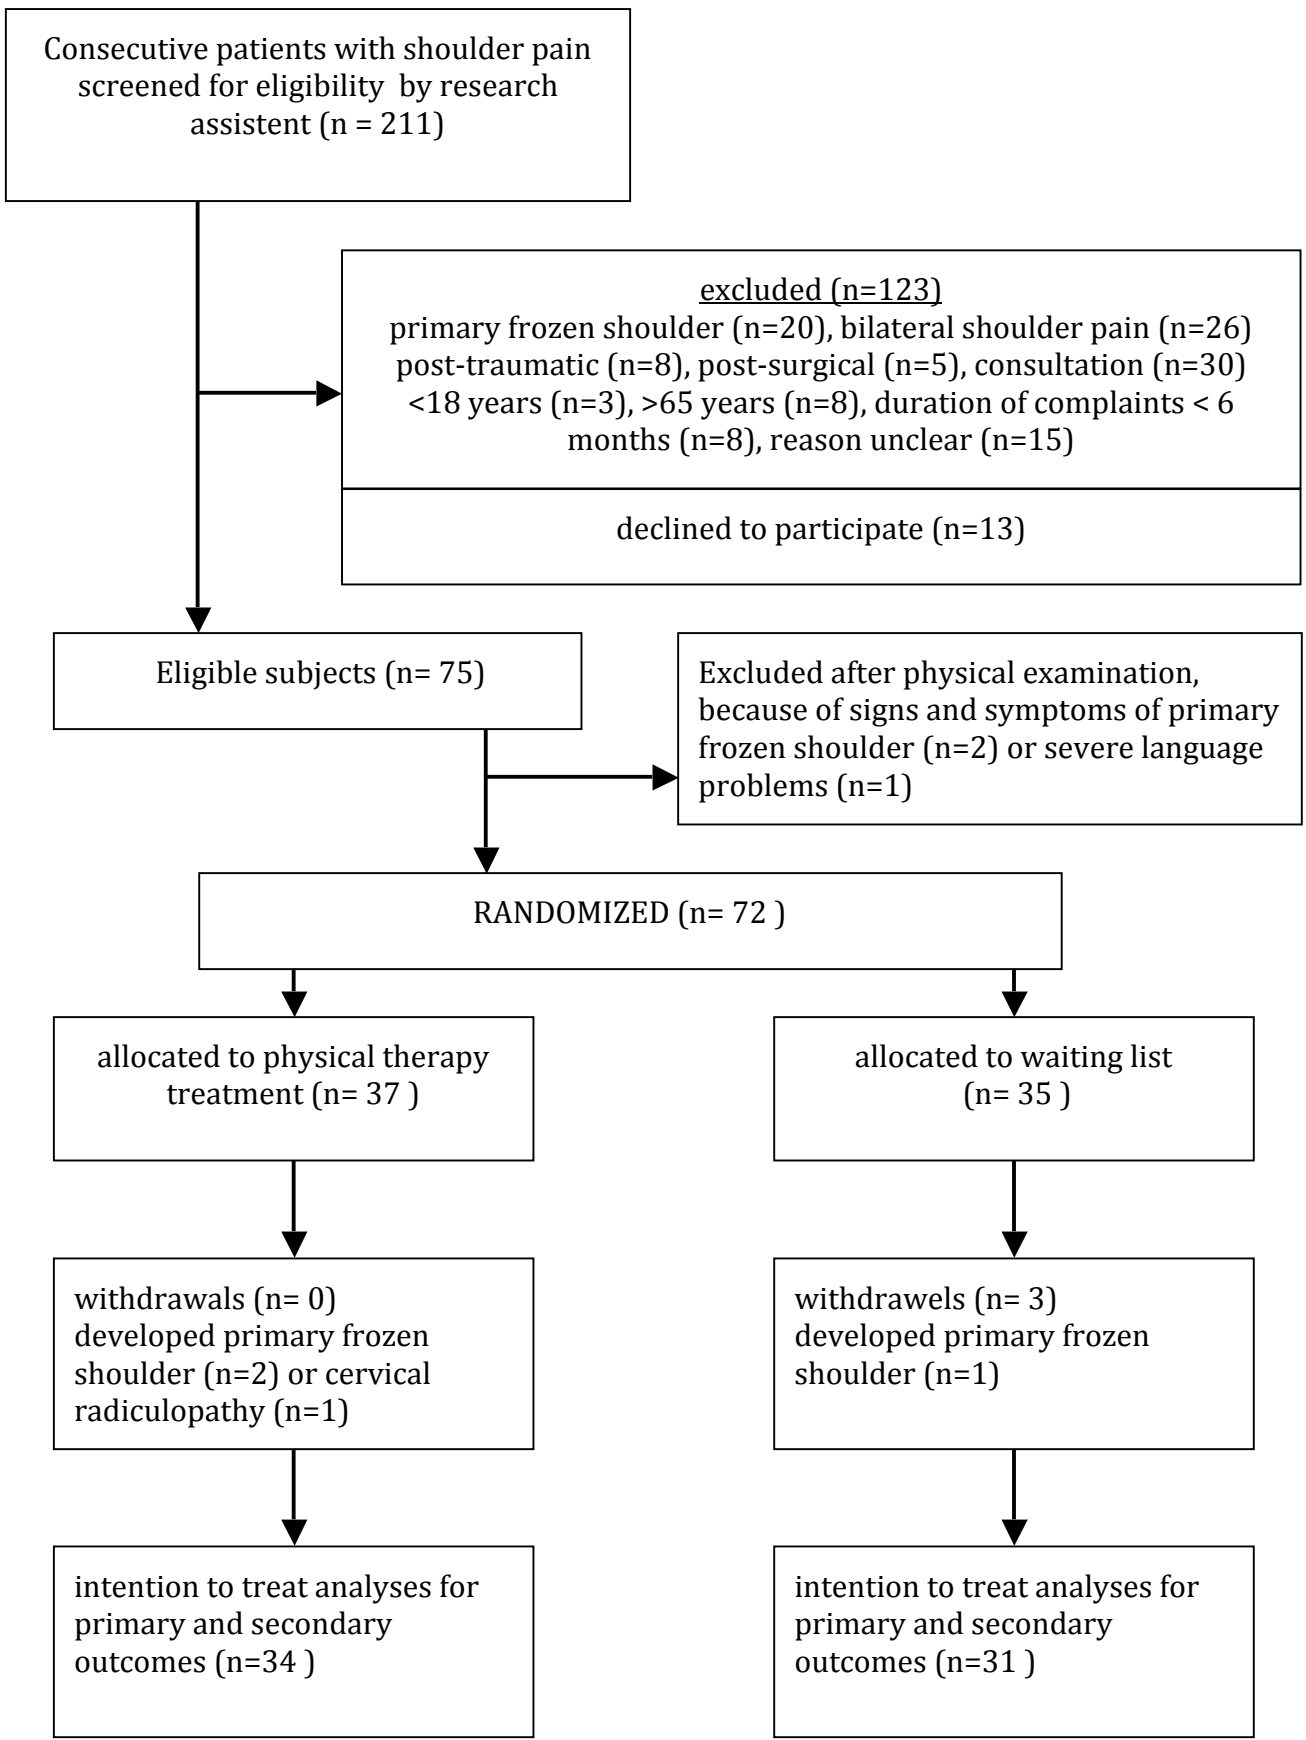

Supplement: MOESM8 [file 9599934]
